# Supplementary material for: The reduced kinome of Ostreococcus tauri: core eukaryotic signalling components in a tractable model species
Source: PubMed Central journal article supplement (PMC4143559; doi:10.1186/1471-2164-15-640), 2014-08-02

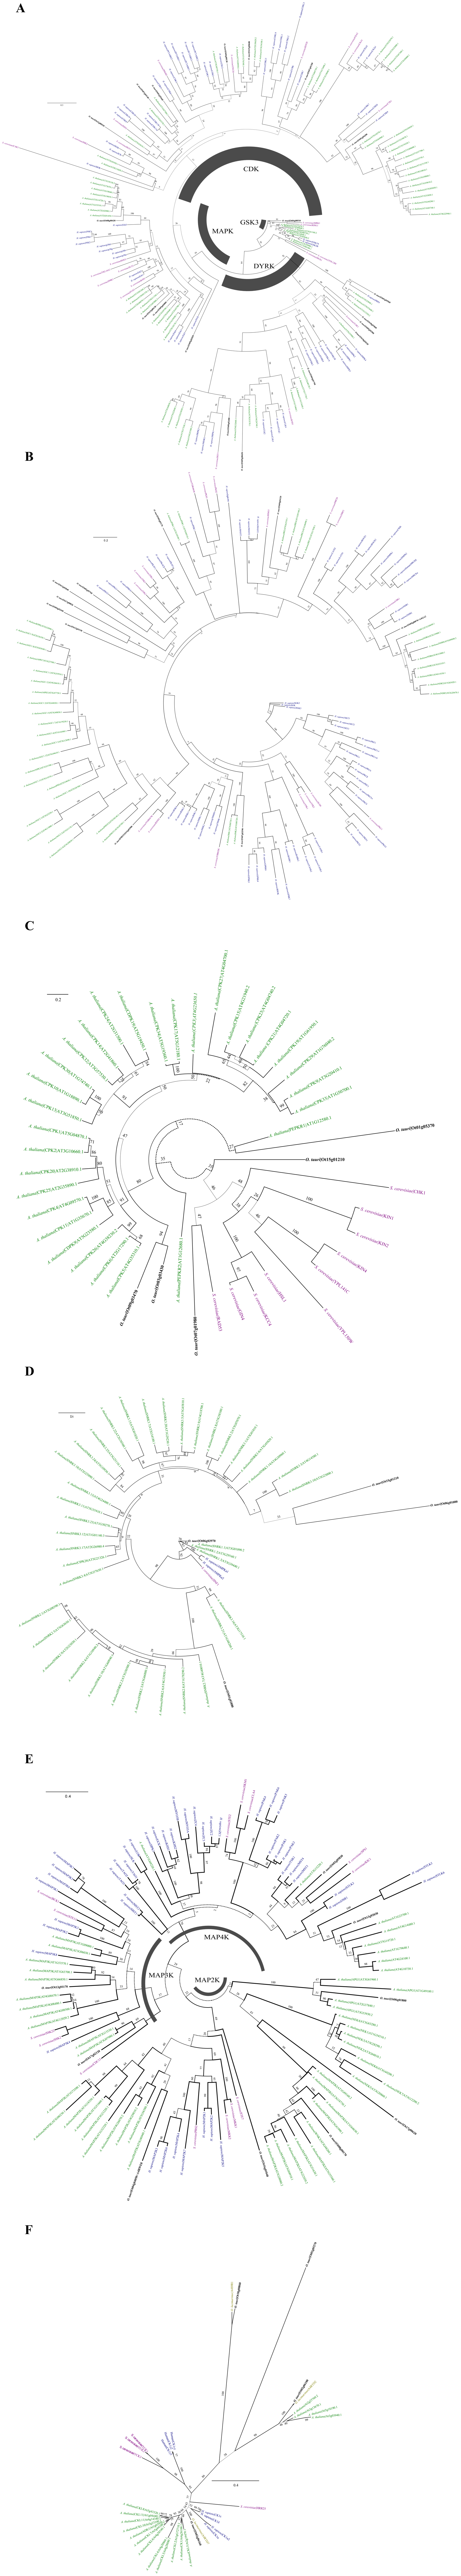

Supplement: 12864_2014_6366_MOESM7_ESM.pdf [file 12864_2014_6366_MOESM7_ESM.pdf]
